# Supplementary material for: Functional roles of ST8SIA3-mediated sialylation of striatal dopamine D2 and adenosine A2A receptors
Source: PubMed Central journal article supplement (PMC6712005; doi:10.1038/s41398-019-0529-z), 2019-08-27
Supplement: 41398_2019_529_MOESM2_ESM.pdf [file 41398_2019_529_MOESM2_ESM.pdf]

| Modified-SHIRPA of <i>St8sia3</i> WT/KO mice                       |       |                                                       | <i>St8sia3</i> WT Mice |    |    |    |    |    |    |    |    |     | <i>St8sia3</i> KO Mice |    |    |    |    |    |    |    |    |     |
|--------------------------------------------------------------------|-------|-------------------------------------------------------|------------------------|----|----|----|----|----|----|----|----|-----|------------------------|----|----|----|----|----|----|----|----|-----|
| List of tests in modified-SHIRPA (Individual score for each mouse) |       |                                                       |                        |    |    |    |    |    |    |    |    |     |                        |    |    |    |    |    |    |    |    |     |
| The scores in <b>black</b> indicate criteria by CSBL/6J mice       |       |                                                       |                        |    |    |    |    |    |    |    |    |     |                        |    |    |    |    |    |    |    |    |     |
| Items                                                              | Score | Description                                           | #1                     | #2 | #3 | #4 | #5 | #6 | #7 | #8 | #9 | #10 | #1                     | #2 | #3 | #4 | #5 | #6 | #7 | #8 | #9 | #10 |
| 1.Coat color                                                       | 0=    | Normal                                                |                        |    |    |    |    |    |    |    |    |     |                        |    |    |    |    |    |    |    |    |     |
|                                                                    | 1=    | Dilution                                              |                        |    |    |    |    |    |    |    |    |     |                        |    |    |    |    |    |    |    |    |     |
|                                                                    | 2=    | Whitespot                                             |                        |    |    |    |    |    |    |    |    |     |                        |    |    |    |    |    |    |    |    |     |
|                                                                    | 3=    | Color change                                          |                        |    |    |    |    |    |    |    |    |     |                        |    |    |    |    |    |    |    |    |     |
|                                                                    | 4=    | Other                                                 |                        |    |    |    |    |    |    |    |    |     |                        |    |    |    |    |    |    |    |    |     |
| 2.Hair length                                                      | 0=    | Normal                                                |                        |    |    |    |    |    |    |    |    |     |                        |    |    |    |    |    |    |    |    |     |
|                                                                    | 1=    | alopecia                                              |                        |    |    |    |    |    |    |    |    |     |                        |    |    |    |    |    |    |    |    |     |
|                                                                    | 2=    | short                                                 |                        |    |    |    |    |    |    |    |    |     |                        |    |    |    |    |    |    |    |    |     |
|                                                                    | 3=    | long                                                  |                        |    |    |    |    |    |    |    |    |     |                        |    |    |    |    |    |    |    |    |     |
|                                                                    | 4=    | Other                                                 |                        |    |    |    |    |    |    |    |    |     |                        |    |    |    |    |    |    |    |    |     |
| 3.Hair morphology                                                  | 0=    | Normal                                                |                        |    |    |    |    |    |    |    |    |     |                        |    |    |    |    |    |    |    |    |     |
|                                                                    | 1=    | curl                                                  |                        |    |    |    |    |    |    |    |    |     |                        |    |    |    |    |    |    |    |    |     |
|                                                                    | 2=    | Other                                                 |                        |    |    |    |    |    |    |    |    |     |                        |    |    |    |    |    |    |    |    |     |
|                                                                    | 0=    | Gasping, irregular                                    |                        |    |    |    |    |    |    |    |    |     |                        |    |    |    |    |    |    |    |    |     |
|                                                                    | 1=    | slow, shallow                                         |                        |    |    |    |    |    |    |    |    |     |                        |    |    |    |    |    |    |    |    |     |
| 4.Respiration rate                                                 | 0=    | Normal                                                |                        |    |    |    |    |    |    |    |    |     |                        |    |    |    |    |    |    |    |    |     |
|                                                                    | 1=    | Normal                                                |                        |    |    |    |    |    |    |    |    |     |                        |    |    |    |    |    |    |    |    |     |
|                                                                    | 2=    | Normal                                                |                        |    |    |    |    |    |    |    |    |     |                        |    |    |    |    |    |    |    |    |     |
|                                                                    | 3=    | Hyperventilation                                      |                        |    |    |    |    |    |    |    |    |     |                        |    |    |    |    |    |    |    |    |     |
|                                                                    | 4=    | Other                                                 |                        |    |    |    |    |    |    |    |    |     |                        |    |    |    |    |    |    |    |    |     |
| 5.Tremor                                                           | 0=    | None                                                  |                        |    |    |    |    |    |    |    |    |     |                        |    |    |    |    |    |    |    |    |     |
|                                                                    | 1=    | Mild                                                  |                        |    |    |    |    |    |    |    |    |     |                        |    |    |    |    |    |    |    |    |     |
|                                                                    | 2=    | Marked                                                |                        |    |    |    |    |    |    |    |    |     |                        |    |    |    |    |    |    |    |    |     |
|                                                                    | 0=    | Completely flat                                       |                        |    |    |    |    |    |    |    |    |     |                        |    |    |    |    |    |    |    |    |     |
|                                                                    | 1=    | Lying on side                                         |                        |    |    |    |    |    |    |    |    |     |                        |    |    |    |    |    |    |    |    |     |
| 6.Body position                                                    | 2=    | Lying prone                                           |                        |    |    |    |    |    |    |    |    |     |                        |    |    |    |    |    |    |    |    |     |
|                                                                    | 3=    | Sitting or standing                                   |                        |    |    |    |    |    |    |    |    |     |                        |    |    |    |    |    |    |    |    |     |
|                                                                    | 4=    | Rearing on hind legs                                  |                        |    |    |    |    |    |    |    |    |     |                        |    |    |    |    |    |    |    |    |     |
|                                                                    | 0=    | Repeated vertical leaping                             |                        |    |    |    |    |    |    |    |    |     |                        |    |    |    |    |    |    |    |    |     |
|                                                                    | 1=    | None, scratching                                      |                        |    |    |    |    |    |    |    |    |     |                        |    |    |    |    |    |    |    |    |     |
| 7. Spontaneous activity                                            | 1=    | Casual scratch, groom, slow movement                  |                        |    |    |    |    |    |    |    |    |     |                        |    |    |    |    |    |    |    |    |     |
|                                                                    | 2=    | Vigorous scratch, groom, moderate movement            |                        |    |    |    |    |    |    |    |    |     |                        |    |    |    |    |    |    |    |    |     |
|                                                                    | 3=    | Vigorous, rapid/dart movement                         |                        |    |    |    |    |    |    |    |    |     |                        |    |    |    |    |    |    |    |    |     |
|                                                                    | 4=    | Extremely vigorous, rapid/dart movement               |                        |    |    |    |    |    |    |    |    |     |                        |    |    |    |    |    |    |    |    |     |
|                                                                    | 0=    | None                                                  |                        |    |    |    |    |    |    |    |    |     |                        |    |    |    |    |    |    |    |    |     |
| 8.Defecation                                                       | 0=    | None                                                  |                        |    |    |    |    |    |    |    |    |     |                        |    |    |    |    |    |    |    |    |     |
|                                                                    | 1=    | Done                                                  |                        |    |    |    |    |    |    |    |    |     |                        |    |    |    |    |    |    |    |    |     |
|                                                                    | 2=    | Done                                                  |                        |    |    |    |    |    |    |    |    |     |                        |    |    |    |    |    |    |    |    |     |
|                                                                    | 3=    | Done                                                  |                        |    |    |    |    |    |    |    |    |     |                        |    |    |    |    |    |    |    |    |     |
|                                                                    | 4=    | Done                                                  |                        |    |    |    |    |    |    |    |    |     |                        |    |    |    |    |    |    |    |    |     |
| 9.Urination                                                        | 0=    | None                                                  |                        |    |    |    |    |    |    |    |    |     |                        |    |    |    |    |    |    |    |    |     |
|                                                                    | 1=    | Done                                                  |                        |    |    |    |    |    |    |    |    |     |                        |    |    |    |    |    |    |    |    |     |
|                                                                    | 2=    | Done                                                  |                        |    |    |    |    |    |    |    |    |     |                        |    |    |    |    |    |    |    |    |     |
|                                                                    | 3=    | Done                                                  |                        |    |    |    |    |    |    |    |    |     |                        |    |    |    |    |    |    |    |    |     |
|                                                                    | 4=    | Done                                                  |                        |    |    |    |    |    |    |    |    |     |                        |    |    |    |    |    |    |    |    |     |
| 10.Elapsed time before the mouse starts to move (secs)             | 0=    | None                                                  |                        |    |    |    |    |    |    |    |    |     |                        |    |    |    |    |    |    |    |    |     |
|                                                                    | 1=    | Done                                                  |                        |    |    |    |    |    |    |    |    |     |                        |    |    |    |    |    |    |    |    |     |
|                                                                    | 2=    | Done                                                  |                        |    |    |    |    |    |    |    |    |     |                        |    |    |    |    |    |    |    |    |     |
|                                                                    | 3=    | Done                                                  |                        |    |    |    |    |    |    |    |    |     |                        |    |    |    |    |    |    |    |    |     |
|                                                                    | 4=    | Done                                                  |                        |    |    |    |    |    |    |    |    |     |                        |    |    |    |    |    |    |    |    |     |
| 11.Locomotor activity                                              | 0=    | Coma                                                  |                        |    |    |    |    |    |    |    |    |     |                        |    |    |    |    |    |    |    |    |     |
|                                                                    | 1=    | Prolonged freeze, then slight movement                |                        |    |    |    |    |    |    |    |    |     |                        |    |    |    |    |    |    |    |    |     |
|                                                                    | 2=    | Extended freeze, then moderate movement               |                        |    |    |    |    |    |    |    |    |     |                        |    |    |    |    |    |    |    |    |     |
|                                                                    | 3=    | Brief freeze (few seconds), then active movement      |                        |    |    |    |    |    |    |    |    |     |                        |    |    |    |    |    |    |    |    |     |
|                                                                    | 4=    | Momentary freeze, then swift movement                 |                        |    |    |    |    |    |    |    |    |     |                        |    |    |    |    |    |    |    |    |     |
| 12.transfer arousal                                                | 0=    | None, immediate movement                              |                        |    |    |    |    |    |    |    |    |     |                        |    |    |    |    |    |    |    |    |     |
|                                                                    | 1=    | None                                                  |                        |    |    |    |    |    |    |    |    |     |                        |    |    |    |    |    |    |    |    |     |
|                                                                    | 2=    | Coat stood on end                                     |                        |    |    |    |    |    |    |    |    |     |                        |    |    |    |    |    |    |    |    |     |
|                                                                    | 3=    | Eyes wide open                                        |                        |    |    |    |    |    |    |    |    |     |                        |    |    |    |    |    |    |    |    |     |
|                                                                    | 4=    | Eyes 1/2 closed                                       |                        |    |    |    |    |    |    |    |    |     |                        |    |    |    |    |    |    |    |    |     |
| 13.Piloerection                                                    | 0=    | None                                                  |                        |    |    |    |    |    |    |    |    |     |                        |    |    |    |    |    |    |    |    |     |
|                                                                    | 1=    | Coat stood on end                                     |                        |    |    |    |    |    |    |    |    |     |                        |    |    |    |    |    |    |    |    |     |
|                                                                    | 2=    | Eyes wide open                                        |                        |    |    |    |    |    |    |    |    |     |                        |    |    |    |    |    |    |    |    |     |
|                                                                    | 3=    | Eyes 1/2 closed                                       |                        |    |    |    |    |    |    |    |    |     |                        |    |    |    |    |    |    |    |    |     |
|                                                                    | 4=    | Eyes closed                                           |                        |    |    |    |    |    |    |    |    |     |                        |    |    |    |    |    |    |    |    |     |
| 14.Palpebral closure                                               | 0=    | None                                                  |                        |    |    |    |    |    |    |    |    |     |                        |    |    |    |    |    |    |    |    |     |
|                                                                    | 1=    | Prever reflex (backwards flick of pinnae)             |                        |    |    |    |    |    |    |    |    |     |                        |    |    |    |    |    |    |    |    |     |
|                                                                    | 2=    | Jump less than 1cm                                    |                        |    |    |    |    |    |    |    |    |     |                        |    |    |    |    |    |    |    |    |     |
|                                                                    | 3=    | Jump more than 1cm                                    |                        |    |    |    |    |    |    |    |    |     |                        |    |    |    |    |    |    |    |    |     |
|                                                                    | 4=    | Other                                                 |                        |    |    |    |    |    |    |    |    |     |                        |    |    |    |    |    |    |    |    |     |
| 15.Startle response                                                | 0=    | Normal                                                |                        |    |    |    |    |    |    |    |    |     |                        |    |    |    |    |    |    |    |    |     |
|                                                                    | 1=    | Fluid but abnormal                                    |                        |    |    |    |    |    |    |    |    |     |                        |    |    |    |    |    |    |    |    |     |
|                                                                    | 2=    | Limited movement only                                 |                        |    |    |    |    |    |    |    |    |     |                        |    |    |    |    |    |    |    |    |     |
|                                                                    | 3=    | Incapacity                                            |                        |    |    |    |    |    |    |    |    |     |                        |    |    |    |    |    |    |    |    |     |
|                                                                    | 4=    | Markedly flattened                                    |                        |    |    |    |    |    |    |    |    |     |                        |    |    |    |    |    |    |    |    |     |
| 16.Gait                                                            | 0=    | Barely touches                                        |                        |    |    |    |    |    |    |    |    |     |                        |    |    |    |    |    |    |    |    |     |
|                                                                    | 1=    | Normal (3mm elevation)                                |                        |    |    |    |    |    |    |    |    |     |                        |    |    |    |    |    |    |    |    |     |
|                                                                    | 2=    | Elevated (more than 3mm elevation)                    |                        |    |    |    |    |    |    |    |    |     |                        |    |    |    |    |    |    |    |    |     |
|                                                                    | 3=    | Dragging (more than 3mm elevation)                    |                        |    |    |    |    |    |    |    |    |     |                        |    |    |    |    |    |    |    |    |     |
|                                                                    | 4=    | Other                                                 |                        |    |    |    |    |    |    |    |    |     |                        |    |    |    |    |    |    |    |    |     |
| 17.Pelvic elevation                                                | 0=    | None                                                  |                        |    |    |    |    |    |    |    |    |     |                        |    |    |    |    |    |    |    |    |     |
|                                                                    | 1=    | Horizontally extended                                 |                        |    |    |    |    |    |    |    |    |     |                        |    |    |    |    |    |    |    |    |     |
|                                                                    | 2=    | Elevated/Straub Tail                                  |                        |    |    |    |    |    |    |    |    |     |                        |    |    |    |    |    |    |    |    |     |
|                                                                    | 3=    | No response                                           |                        |    |    |    |    |    |    |    |    |     |                        |    |    |    |    |    |    |    |    |     |
|                                                                    | 4=    | Other                                                 |                        |    |    |    |    |    |    |    |    |     |                        |    |    |    |    |    |    |    |    |     |
| 18.Tail elevation                                                  | 0=    | Mild (escape response to firm stroke)                 |                        |    |    |    |    |    |    |    |    |     |                        |    |    |    |    |    |    |    |    |     |
|                                                                    | 1=    | Moderate (rapid response to light stroke)             |                        |    |    |    |    |    |    |    |    |     |                        |    |    |    |    |    |    |    |    |     |
|                                                                    | 2=    | Vigorous (escape response to approach)                |                        |    |    |    |    |    |    |    |    |     |                        |    |    |    |    |    |    |    |    |     |
|                                                                    | 3=    | Struggles when held by tail                           |                        |    |    |    |    |    |    |    |    |     |                        |    |    |    |    |    |    |    |    |     |
|                                                                    | 4=    | Other                                                 |                        |    |    |    |    |    |    |    |    |     |                        |    |    |    |    |    |    |    |    |     |
| 19.Touch escape                                                    | 0=    | Struggles when held by neck (finger grip, not scruff) |                        |    |    |    |    |    |    |    |    |     |                        |    |    |    |    |    |    |    |    |     |
|                                                                    | 1=    | Struggles when held by neck (finger grip, not scruff) |                        |    |    |    |    |    |    |    |    |     |                        |    |    |    |    |    |    |    |    |     |
|                                                                    | 2=    | Struggles when held supine (on back)                  |                        |    |    |    |    |    |    |    |    |     |                        |    |    |    |    |    |    |    |    |     |
|                                                                    | 3=    | Struggles when held by hind legs                      |                        |    |    |    |    |    |    |    |    |     |                        |    |    |    |    |    |    |    |    |     |
|                                                                    | 4=    | No straggle                                           |                        |    |    |    |    |    |    |    |    |     |                        |    |    |    |    |    |    |    |    |     |
| 20.Positional passivity                                            | 0=    | Absent                                                |                        |    |    |    |    |    |    |    |    |     |                        |    |    |    |    |    |    |    |    |     |
|                                                                    | 1=    | Present                                               |                        |    |    |    |    |    |    |    |    |     |                        |    |    |    |    |    |    |    |    |     |
|                                                                    | 2=    | Absent                                                |                        |    |    |    |    |    |    |    |    |     |                        |    |    |    |    |    |    |    |    |     |
|                                                                    | 3=    | Present                                               |                        |    |    |    |    |    |    |    |    |     |                        |    |    |    |    |    |    |    |    |     |
|                                                                    | 4=    | Present                                               |                        |    |    |    |    |    |    |    |    |     |                        |    |    |    |    |    |    |    |    |     |
| 21.Trunk curl                                                      | 0=    | None                                                  |                        |    |    |    |    |    |    |    |    |     |                        |    |    |    |    |    |    |    |    |     |
|                                                                    | 1=    | Upon nose contact                                     |                        |    |    |    |    |    |    |    |    |     |                        |    |    |    |    |    |    |    |    |     |
|                                                                    | 2=    | Upon vibrasense contact                               |                        |    |    |    |    |    |    |    |    |     |                        |    |    |    |    |    |    |    |    |     |
|                                                                    | 3=    | Before vibrasense contact (18mm)                      |                        |    |    |    |    |    |    |    |    |     |                        |    |    |    |    |    |    |    |    |     |
|                                                                    | 4=    | Early vigorous extension (25mm)                       |                        |    |    |    |    |    |    |    |    |     |                        |    |    |    |    |    |    |    |    |     |
| 22.Limb grasping                                                   | 0=    | None                                                  |                        |    |    |    |    |    |    |    |    |     |                        |    |    |    |    |    |    |    |    |     |
|                                                                    | 1=    | Slight grip, semi-effective                           |                        |    |    |    |    |    |    |    |    |     |                        |    |    |    |    |    |    |    |    |     |
|                                                                    | 2=    | Moderate grip, effective                              |                        |    |    |    |    |    |    |    |    |     |                        |    |    |    |    |    |    |    |    |     |
|                                                                    | 3=    | Active grip, effective                                |                        |    |    |    |    |    |    |    |    |     |                        |    |    |    |    |    |    |    |    |     |
|                                                                    | 4=    | Unusually effective                                   |                        |    |    |    |    |    |    |    |    |     |                        |    |    |    |    |    |    |    |    |     |
| 23.Visual Placing                                                  | 0=    | Flaccid, no                                           |                        |    |    |    |    |    |    |    |    |     |                        |    |    |    |    |    |    |    |    |     |

|                             |                  |                                                            |      |      |      |      |      |      |      |      |      |      |      |      |      |      |      |      |      |      |      |      |
|-----------------------------|------------------|------------------------------------------------------------|------|------|------|------|------|------|------|------|------|------|------|------|------|------|------|------|------|------|------|------|
| 41. Abdominal tone          | 1=               | Slight resistance                                          | 1    | 1    | 1    | 1    | 1    | 1    | 1    | 1    | 1    | 1    | 1    | 1    | 1    | 1    | 1    | 1    | 1    | 1    | 1    |      |
|                             | 2=               | Extreme resistance, board like                             |      |      |      |      |      |      |      |      |      |      |      |      |      |      |      |      |      |      |      |      |
|                             | 0=               | Blanched                                                   |      |      |      |      |      |      |      |      |      |      |      |      |      |      |      |      |      |      |      |      |
|                             | 1=               | Pink                                                       |      |      |      |      |      |      |      |      |      |      |      |      |      |      |      |      |      |      |      |      |
| 42. Skin color              | 1=               | Pink                                                       | 1    | 1    | 1    | 1    | 1    | 1    | 1    | 1    | 1    | 1    | 1    | 1    | 1    | 1    | 1    | 1    | 1    | 1    | 1    |      |
|                             | 2=               | Bright, deep red flush                                     |      |      |      |      |      |      |      |      |      |      |      |      |      |      |      |      |      |      |      |      |
|                             | 3=               | Mild pigmentation                                          |      |      |      |      |      |      |      |      |      |      |      |      |      |      |      |      |      |      |      |      |
|                             | 4=               | Dark footpad, pigmentation                                 |      |      |      |      |      |      |      |      |      |      |      |      |      |      |      |      |      |      |      |      |
| 43. Limb morphology(FR)     | 0=               | Normal                                                     | 0    | 0    | 0    | 0    | 0    | 0    | 0    | 0    | 0    | 0    | 0    | 0    | 0    | 0    | 0    | 0    | 0    | 0    | 0    |      |
|                             | 1=               | Polydactyl                                                 | 0    | 0    | 0    | 0    | 0    | 0    | 0    | 0    | 0    | 0    | 0    | 0    | 0    | 0    | 0    | 0    | 0    | 0    | 0    |      |
|                             | 2=               | Ectodactyl                                                 | 0    | 0    | 0    | 0    | 0    | 0    | 0    | 0    | 0    | 0    | 0    | 0    | 0    | 0    | 0    | 0    | 0    | 0    | 0    |      |
|                             | 3=               | Abnormality in upper limb                                  | 0    | 0    | 0    | 0    | 0    | 0    | 0    | 0    | 0    | 0    | 0    | 0    | 0    | 0    | 0    | 0    | 0    | 0    | 0    |      |
| 44. Limb morphology(FL)     | 0=               | Normal                                                     | 0    | 0    | 0    | 0    | 0    | 0    | 0    | 0    | 0    | 0    | 0    | 0    | 0    | 0    | 0    | 0    | 0    | 0    | 0    |      |
|                             | 1=               | Polydactyl                                                 | 0    | 0    | 0    | 0    | 0    | 0    | 0    | 0    | 0    | 0    | 0    | 0    | 0    | 0    | 0    | 0    | 0    | 0    | 0    |      |
|                             | 2=               | Ectodactyl                                                 | 0    | 0    | 0    | 0    | 0    | 0    | 0    | 0    | 0    | 0    | 0    | 0    | 0    | 0    | 0    | 0    | 0    | 0    | 0    |      |
|                             | 3=               | Abnormality in upper limb                                  | 0    | 0    | 0    | 0    | 0    | 0    | 0    | 0    | 0    | 0    | 0    | 0    | 0    | 0    | 0    | 0    | 0    | 0    | 0    |      |
| 45. Limb morphology(HR)     | 0=               | Normal                                                     | 0    | 0    | 0    | 0    | 0    | 0    | 0    | 0    | 0    | 0    | 0    | 0    | 0    | 0    | 0    | 0    | 0    | 0    | 0    |      |
|                             | 1=               | Polydactyl                                                 | 0    | 0    | 0    | 0    | 0    | 0    | 0    | 0    | 0    | 0    | 0    | 0    | 0    | 0    | 0    | 0    | 0    | 0    | 0    |      |
|                             | 2=               | Ectodactyl                                                 | 0    | 0    | 0    | 0    | 0    | 0    | 0    | 0    | 0    | 0    | 0    | 0    | 0    | 0    | 0    | 0    | 0    | 0    | 0    |      |
|                             | 3=               | Abnormality in upper limb                                  | 0    | 0    | 0    | 0    | 0    | 0    | 0    | 0    | 0    | 0    | 0    | 0    | 0    | 0    | 0    | 0    | 0    | 0    | 0    |      |
| 46. Limb morphology(HL)     | 0=               | Normal                                                     | 0    | 0    | 0    | 0    | 0    | 0    | 0    | 0    | 0    | 0    | 0    | 0    | 0    | 0    | 0    | 0    | 0    | 0    | 0    |      |
|                             | 1=               | Polydactyl                                                 | 0    | 0    | 0    | 0    | 0    | 0    | 0    | 0    | 0    | 0    | 0    | 0    | 0    | 0    | 0    | 0    | 0    | 0    | 0    |      |
|                             | 2=               | Ectodactyl                                                 | 0    | 0    | 0    | 0    | 0    | 0    | 0    | 0    | 0    | 0    | 0    | 0    | 0    | 0    | 0    | 0    | 0    | 0    | 0    |      |
|                             | 3=               | Abnormality in upper limb                                  | 0    | 0    | 0    | 0    | 0    | 0    | 0    | 0    | 0    | 0    | 0    | 0    | 0    | 0    | 0    | 0    | 0    | 0    | 0    |      |
| 47. Limb tone               | 0=               | No resistance                                              | 1    | 1    | 1    | 1    | 1    | 1    | 1    | 1    | 1    | 1    | 1    | 1    | 1    | 1    | 1    | 1    | 1    | 1    | 1    |      |
|                             | 1=               | Slight resistance                                          |      |      |      |      |      |      |      |      |      |      |      |      |      |      |      |      |      |      |      |      |
|                             | 2=               | Moderate resistance                                        |      |      |      |      |      |      |      |      |      |      |      |      |      |      |      |      |      |      |      |      |
|                             | 3=               | Marked resistance                                          |      |      |      |      |      |      |      |      |      |      |      |      |      |      |      |      |      |      |      |      |
| 48. Wire maneuver           | 0=               | Active grip with hindlegs (5secs)                          | 0    | 0    | 0    | 0    | 1    | 0    | 0    | 0    | 0    | 0    | 1    | 1    | 0    | 0    | 1    | 2    | 1    | 2    | 0    |      |
|                             | 1=               | Difficulty to grip with hindlegs                           |      |      |      |      |      |      |      |      |      |      |      |      |      |      |      |      |      |      |      |      |
|                             | 2=               | Unable to grip with hindlegs                               |      |      |      |      |      |      |      |      |      |      |      |      |      |      |      |      |      |      |      |      |
|                             | 3=               | Unable to lift hindlegs, falls within seconds              |      |      |      |      |      |      |      |      |      |      |      |      |      |      |      |      |      |      |      |      |
| 49. Righting Reflex         | 0=               | No impairment                                              | 0    | 0    | 0    | 0    | 0    | 0    | 0    | 0    | 0    | 0    | 0    | 0    | 0    | 0    | 0    | 0    | 0    | 0    | 0    |      |
|                             | 1=               | Lands on side                                              |      |      |      |      |      |      |      |      |      |      |      |      |      |      |      |      |      |      |      |      |
|                             | 2=               | Lands on back                                              |      |      |      |      |      |      |      |      |      |      |      |      |      |      |      |      |      |      |      |      |
|                             | 3=               | Falls to right when placed on back                         |      |      |      |      |      |      |      |      |      |      |      |      |      |      |      |      |      |      |      |      |
| 50. Contact righting reflex | 0=               | Absent                                                     | 1    | 1    | 1    | 1    | 1    | 1    | 1    | 1    | 1    | 1    | 1    | 1    | 1    | 1    | 1    | 1    | 1    | 1    | 1    |      |
|                             | 1=               | Present                                                    |      |      |      |      |      |      |      |      |      |      |      |      |      |      |      |      |      |      |      |      |
| 51. Negative geotaxis       | 0=               | Turns and climbs the grid                                  | 0    | 0    | 0    | 0    | 0    | 0    | 0    | 0    | 0    | 0    | 0    | 0    | 0    | 0    | 0    | 0    | 0    | 0    | 0    |      |
|                             | 1=               | Turns but then freezes                                     |      |      |      |      |      |      |      |      |      |      |      |      |      |      |      |      |      |      |      |      |
|                             | 2=               | Moves, but fails to turn                                   |      |      |      |      |      |      |      |      |      |      |      |      |      |      |      |      |      |      |      |      |
|                             | 3=               | Does not move within 30 secs                               |      |      |      |      |      |      |      |      |      |      |      |      |      |      |      |      |      |      |      |      |
| 52. Fear                    | 0=               | None                                                       | 0    | 0    | 0    | 0    | 0    | 0    | 0    | 0    | 0    | 0    | 0    | 0    | 0    | 0    | 0    | 0    | 0    | 0    | 0    |      |
|                             | 1=               | Freezes during transfer arousal                            |      |      |      |      |      |      |      |      |      |      |      |      |      |      |      |      |      |      |      |      |
|                             | 0=               | None                                                       | 0    | 0    | 0    | 0    | 0    | 0    | 0    | 0    | 0    | 0    | 0    | 0    | 0    | 0    | 0    | 0    | 0    | 0    | 0    |      |
|                             | 1=               | Struggle during spine restraint                            |      |      |      |      |      |      |      |      |      |      |      |      |      |      |      |      |      |      |      |      |
| 53. Irritability            | 0=               | None                                                       | 0    | 0    | 0    | 0    | 0    | 0    | 0    | 0    | 0    | 0    | 0    | 0    | 0    | 0    | 0    | 0    | 0    | 0    | 0    |      |
|                             | 1=               | Struggle during spine restraint                            |      |      |      |      |      |      |      |      |      |      |      |      |      |      |      |      |      |      |      |      |
| 54. Aggression              | 0=               | None                                                       | 0    | 0    | 0    | 0    | 0    | 0    | 0    | 0    | 0    | 0    | 0    | 0    | 0    | 0    | 0    | 0    | 0    | 0    | 0    |      |
|                             | 1=               | Provoked biting or attack                                  |      |      |      |      |      |      |      |      |      |      |      |      |      |      |      |      |      |      |      |      |
| 55. Vocalization            | 0=               | None                                                       | 1    | 1    | 1    | 1    | 1    | 1    | 1    | 1    | 1    | 1    | 1    | 1    | 1    | 1    | 1    | 1    | 1    | 1    | 1    |      |
|                             | 1=               | Provoked during handling                                   |      |      |      |      |      |      |      |      |      |      |      |      |      |      |      |      |      |      |      |      |
| 56. Bizarre Behaviour       | 0) No Phenotype  |                                                            |      |      |      |      |      |      |      |      |      |      |      |      |      |      |      |      |      |      |      |      |
|                             | a) HF            | Head flicking or head shaking                              |      |      |      |      |      |      |      |      |      |      |      |      |      |      |      |      |      |      |      |      |
|                             | b) HS            | Head searching - repetitive                                |      |      |      |      |      |      |      |      |      |      |      |      |      |      |      |      |      |      |      |      |
|                             | c) H             | Hallucinating                                              |      |      |      |      |      |      |      |      |      |      |      |      |      |      |      |      |      |      |      |      |
|                             | d) B             | Compulsive biting - usually of grid floor                  |      |      |      |      |      |      |      |      |      |      |      |      |      |      |      |      |      |      |      |      |
|                             | e) L             | Compulsive licking - usually of glass jar                  |      |      |      |      |      |      |      |      |      |      |      |      |      |      |      |      |      |      |      |      |
|                             | f) SB            | Self destructive biting                                    |      |      |      |      |      |      |      |      |      |      |      |      |      |      |      |      |      |      |      |      |
|                             | g) P             | Prancing forelimbs                                         | 0    | 0    | 0    | 0    | 0    | 0    | 0    | 0    | 0    | 0    | 0    | 0    | 0    | 0    | 0    | 0    | 0    | 0    | 0    |      |
|                             | h) UW            | Upright walking - hind limbs only                          |      |      |      |      |      |      |      |      |      |      |      |      |      |      |      |      |      |      |      |      |
|                             | i) AW            | Aimless wandering                                          |      |      |      |      |      |      |      |      |      |      |      |      |      |      |      |      |      |      |      |      |
|                             | j) C             | Circling                                                   |      |      |      |      |      |      |      |      |      |      |      |      |      |      |      |      |      |      |      |      |
|                             | k) W             | Waltzing - rapid turning in circles                        |      |      |      |      |      |      |      |      |      |      |      |      |      |      |      |      |      |      |      |      |
|                             | l) R             | Retropulsion - animal walks backwards                      |      |      |      |      |      |      |      |      |      |      |      |      |      |      |      |      |      |      |      |      |
|                             | m) D             | Spatial disorientation - walking or stumbling into objects |      |      |      |      |      |      |      |      |      |      |      |      |      |      |      |      |      |      |      |      |
| n) HB                       | Head bobbing     |                                                            |      |      |      |      |      |      |      |      |      |      |      |      |      |      |      |      |      |      |      |      |
| 57. Convulsions             | 0) No convulsion |                                                            |      |      |      |      |      |      |      |      |      |      |      |      |      |      |      |      |      |      |      |      |
|                             | a-1) C           | Clonic                                                     |      |      |      |      |      |      |      |      |      |      |      |      |      |      |      |      |      |      |      |      |
|                             | a-2) Cs          | Clonic symmetrical                                         |      |      |      |      |      |      |      |      |      |      |      |      |      |      |      |      |      |      |      |      |
|                             | a-3) Rn          | Running excitement                                         |      |      |      |      |      |      |      |      |      |      |      |      |      |      |      |      |      |      |      |      |
|                             | a-4) Ch          | Champing - clonus of the jaws only                         |      |      |      |      |      |      |      |      |      |      |      |      |      |      |      |      |      |      |      |      |
|                             | a-5) P           | Popcorn                                                    |      |      |      |      |      |      |      |      |      |      |      |      |      |      |      |      |      |      |      |      |
|                             | a-6) A           | Asphyxia                                                   |      |      |      |      |      |      |      |      |      |      |      |      |      |      |      |      |      |      |      |      |
|                             | b-1) T           | Tonic                                                      | 0    | 0    | 0    | 0    | 0    | 0    | 0    | 0    | 0    | 0    | 0    | 0    | 0    | 0    | 0    | 0    | 0    | 0    | 0    |      |
|                             | b-1) Tt          | Tonic flexion occurs without extension                     |      |      |      |      |      |      |      |      |      |      |      |      |      |      |      |      |      |      |      |      |
|                             | b-2) Op          | Opisthotonus                                               |      |      |      |      |      |      |      |      |      |      |      |      |      |      |      |      |      |      |      |      |
|                             | b-3) Em          | Emprosthotonus                                             |      |      |      |      |      |      |      |      |      |      |      |      |      |      |      |      |      |      |      |      |
|                             | c-1) Rr          | Rock and roll                                              |      |      |      |      |      |      |      |      |      |      |      |      |      |      |      |      |      |      |      |      |
|                             | c-2) Su          | Sitting up                                                 |      |      |      |      |      |      |      |      |      |      |      |      |      |      |      |      |      |      |      |      |
|                             | c-3) Pr          | Pravine                                                    |      |      |      |      |      |      |      |      |      |      |      |      |      |      |      |      |      |      |      |      |
| 58. Body Weight (g)         |                  |                                                            | 26.7 | 25.0 | 25.2 | 27.8 | 30.1 | 27.1 | 26.4 | 24.0 | 27.0 | 25.9 | 28.9 | 27.9 | 26.9 | 27.2 | 29.4 | 27.7 | 26.1 | 27.5 | 28.5 | 30.7 |
